# Supplementary material for: Exploring the socio-economic and environmental components of infectious diseases using multivariate geovisualization: West Nile Virus
Source: PeerJ. 2020 Jul 27;8:e9577. doi: 10.7717/peerj.9577 (PMC7391972; doi:10.7717/peerj.9577)
Supplement: Supplemental Information 1 — This dataset was developed to support research intended to develop a spatially explicit model that explores environmental data related to the risk of exposure to WNV, and the susceptibility to WNV disease based on demographic data of the potentially affected population. The model was developed and then tested on census tracts in an identified 1-standard deviation of WNV incidence in central California. The dataset contains (1) U.S. Census Bureau demographic data for 1,133 census tracks in the ellipse, and (2) and average mosquito habitat risk data for each of those census tracks based upon the model described by West Nile Virus risk based on mosquito habitat model as described in: Kala AK, Tiwari C, Mikler AR and Atkinson SF, 2017, A comparison of least squares regression and geographically weighted regression modeling of West Nile Virus risk based on environmental parameters, PeerJ 5:e3070; DOI 10.7717/peerj.3070 [file peerj-08-9577-s001.xlsx]

## Sheet: Metadata
EXPLORING THE RELATIONSHIPS BETWEEN POPULATION VULNERABILITY AND VECTOR-BORNE DISEASE RISK -
A SPATIALMODELING AND MULTIVARIATE GEOVISUALIZATION APPROACH
Data prepared by Drs. Abhishek Kala and Samuel Atkinson, 19 February 2020
Advanced Environmental Research Institute
University of North Texas
Denton, TX. 76203
Excel spreadsheet with 2 tabs:
tab 1 = metadata
tab 2 = data
Some data extracted from U.S. Government sources:
Demographic data were extracted from U.S. Census Bureau
Data are for 1,133 census tracks in central California
Column name		Description
ID		Study generated identification number for a census tract
Census_Tract		Census Bureau assigned tract number
Percent_Male		Percent of census tract's population identified as male
Percent_White		Percent of census tract's population identified as white
Percent_Black		Percent of census tract's population identified as black
Percent_Hispanic		Percent of census tract's population identified as hispanic
Median_Age		Median age of population in census tract
Median_HH_Income		Median household income in census tract
Model_Risk		West Nile Virus risk based on mosquito habitat model as described in Kala AK, Tiwari C, Mikler AR and Atkinson SF, 2017, A comparison of least squares regression and geographically weighted regression modeling of West Nile Virus risk based on environmental parameters, PeerJ 5:e3070; DOI 10.7717/preej.3070

## Sheet: CensusTracts_Variables
ID	Census_Tract	Percent_Male	Percent_White	Percent_Black	Percent_Hispani	Median_Age	Median_HH_Income	Model_Risk
1	6047002301	49.7	79.3	1.6	51	34.1	59495	6.43
2	6047002302	50.3	78.2	5.3	68	28.1	53065	5.90244
3	6047001501	49.7	51.8	5.6	57.3	26.7	39123	6.3
4	6047000901	64.2	72.2	4.9	42.4	28.6	48851	5.52511
5	6047001002	47.4	49.9	6.6	33.3	27.2	70960	6.3
6	6061020711	50.5	85.1	2.8	10.6	36.3	58613	6.66
7	6061020712	48.2	93.3	0.5	23.3	45.6	44296	6.86667
8	6061023900	45.5	76.1	1.3	22.6	31.8	89315	6.21667
9	6061023700	46.3	90.4	1.9	2.4	70.3	65294	6.68333
10	6061020805	46.7	75.7	0.5	14.1	35.1	63176	7.25
11	6061023200	50	69.3	0.9	18.5	29.9	95481	6.675
12	6047001700	50.8	70.8	1.8	52.4	28.4	31200	6.5
13	6061020715	53.4	92.5	0.7	7.6	36.5	74000	6.8
14	6061020714	46.5	84.2	1.6	11.1	45.6	68659	7.26667
15	6061021129	47	87.9	0.4	9.8	34.1	61610	6.83333
16	6061021322	49.3	72.2	2.2	8.9	33.4	92617	6.2957
17	6047001602	52.5	44.3	4.1	69.9	22.6	34577	6.08571
18	6061021040	40.2	97.5	0	3	75	46941	7.62
19	6061021038	48.2	85.3	1.7	20.8	35.3	81760	7.4
20	6047001503	47.5	40	6.3	60.6	22.7	26637	6.4
21	6047000701	47.1	72.3	1.7	53.2	30.1	31477	6.13333
22	6047000503	69.7	58.3	15.6	46.4	34.4	46750	5.77258
23	6047001901	51.9	58.6	1.1	87	26.2	32027	5.26842
24	6047001902	51	64.5	0.5	71.1	33.4	42051	5.06711
25	6047000505	52.7	57	1.3	58.7	26.9	45530	6.04717
26	6047000902	53.4	67.6	1.8	52	30.6	61085	6.376
27	6061020908	52.5	77.9	1.9	24.2	32.9	54238	7.49333
28	6061021046	51.4	73.1	0.2	13.4	33	55037	7.33333
29	6017031402	49.8	94.7	0	3.4	49.1	50192	4.33643
30	6017031502	48	91.8	1.1	10.5	45.6	47692	5.66667
31	6017030801	50	93.1	0	5	46.5	88851	5.47945
32	6017030804	49.4	92.2	0.9	11.5	46.5	91050	5.58442
33	6017030601	50.7	94.5	0.7	3.2	46.3	82260	5.70192
34	6017030902	52.1	94.1	0.4	4.4	51.9	83661	5.8322
35	6017031302	44.9	95.7	0	13.2	46.6	40489	4.30513
36	6017031200	46.4	86.2	1.1	10.8	41.8	64881	5.70435
37	6017030603	49.8	92.4	0.6	1.6	50.1	60039	3.47534
38	6017031405	50.5	92.5	0	2.2	48.6	69107	4.50286
39	6017031404	55.7	96.1	1.8	4.7	51.4	74464	5.12449
40	6017030602	51.8	91	0.3	7.8	46.1	60430	4.5988
41	6017030704	52	85.8	0.5	7.5	39.2	81250	5.72606
42	6017030803	47.3	89.8	0.3	12.6	43.5	80563	5.61786
43	6017031100	48.9	85.6	0.2	15	46.2	48323	5.91591
44	6017031301	51.8	98.2	0.2	3.5	52.7	67500	5.03393
45	6017031406	47.2	93.5	0	4.9	44.9	63368	4.27021
46	6047002202	49.3	74.9	2.7	75.3	29.1	52765	5.94
47	6061021034	49.3	76.2	1.5	10.5	35.7	94583	7.2
48	6061021035	46.4	78.7	0.8	15.2	35.8	98641	7.63333
49	6017031000	48.3	79.3	0.7	24.7	42.9	55536	6.22258
50	6017031503	48.9	94.5	0	11	51.4	71369	5.53276
51	6017031504	51	94.8	0.1	10.5	44.6	63490	5.40417
52	6017030901	48.2	95.6	0	3	50.6	86944	5.94267
53	6017030701	53.8	88	0.5	6.1	44.8	127743	5.08333
54	6047000202	49	81.6	2	67.9	33.4	46168	6.17931
55	6047000201	51.3	75.7	0.6	56.6	30.2	45500	6.15423
56	6047000401	60.9	85.7	0	36.6	31.3	50719	5.49787
57	6047000402	50.4	93.6	0.5	9.5	39.2	55216	5.75882
58	6047002401	51.8	93.7	0	46.3	39.9	38963	5.5369
59	6061021044	51	85.4	2	17.3	29	101406	7.66667
60	6061021039	39.7	93.8	0	2.3	75.7	56033	7.7
61	6047002402	55.3	82.6	2.8	73.4	29.4	33582	5.87778
62	6047000203	48.1	55.9	4	68.1	29.5	50519	6.525
63	6047002600	48.9	72.4	6	31.4	30.7	71435	6.28649
64	6047002500	53.2	71.5	0	29.7	40.3	58158	4.43812
65	6061021131	48.7	80.9	0.7	9	36.7	70619	6.66667
66	6061021309	50.8	78.1	0.9	16.6	31.4	112474	6.81429
67	6061021130	43.5	65.5	1.2	19	32.9	38485	6.75
68	6061021603	48.6	86.3	0.3	19.2	44.7	35037	5.55
69	6017030710	47.7	79.6	6.4	7.1	40.1	137835	5.475
70	6017030706	47.5	90.5	2.5	7.5	42.7	115268	5.8
71	6017030709	58.5	84.6	0	9.5	42.9	123878	5.225
72	6061021403	51.2	82.7	0.9	44.4	30.1	40786	6.13333
73	6061021122	49.1	93.4	1.2	4.7	45.7	92027	6.6
74	6061021128	46.8	83.8	4.5	5.1	32.4	63044	7
75	6017030808	48.4	88.7	0.2	14.3	40.2	84324	5.2375
76	6017030810	49.2	91.2	0.5	15.8	42.4	66188	5.3
77	6017030807	49.3	86.1	2	12.5	40.3	87480	5.33333
78	6017030809	48	97.1	0	11.2	40.6	85391	5.6
79	6017031900	58.9	97.8	0	8.9	56.6	49167	4.42094
80	6017031700	48.7	84.5	2.2	1.6	40.5	130263	5.25
81	6017031800	52.7	70.4	1.1	7.4	37.8	126768	5.69
82	6061020300	46.4	87.2	0.6	9.7	38.6	39838	6
83	6061020605	51	82.7	2.5	5.8	44.6	128922	6.32727
84	6061021502	48.1	90.9	0.6	11	45.1	78333	5.91
85	6061020200	48.8	92.6	0	5.3	50.1	61492	3.38264
86	6061021801	48.7	91.2	0.3	7	51.2	84132	5.62564
87	6061022002	51.5	95.2	0.2	7.5	48	63622	5.17067
88	6061021902	48	92.9	0	3.3	48.3	71731	5.5
89	6061021037	46.5	73.8	5.2	11.8	36.4	69330	7.4
90	6061020710	45.3	87.4	0.2	11.9	46.7	107877	6.825
91	6061020401	44.5	78.1	5.9	6.3	45.2	29770	5.96667
92	6061021802	49.7	84	0.7	10.5	47.1	49984	5.90385
93	6061020602	47.4	93.8	0.4	5.7	45.3	87683	5.86333
94	6061021003	45.5	82.8	1.8	24.5	35.5	71263	7.1
95	6061020601	45.5	91.7	0	5.2	46.5	123681	5.57037
96	6061021401	50.7	84.2	0	29.7	36.4	52083	6.18
97	6061021109	50.6	84.9	2.2	8	38.5	106995	6.55
98	6061021043	50.2	81.6	5.7	10.1	39.2	97109	7.45
99	6061021203	50.3	92.8	0.5	3.2	41.6	71728	6.18125
100	6061023500	51.3	80.2	0.8	11.9	33.1	106401	6.73571
101	6061023800	44.2	94.1	2.2	3.5	70	62550	6.58182
102	6061021108	44.8	91.7	0	15.5	42.7	47406	6.9
103	6061020901	52.6	68.5	2.1	47.1	31.5	39982	7.45
104	6061021304	50.8	90.9	0	18	44.1	63611	5.2384
105	6061020606	52.4	81.3	1.2	4.3	45.3	137500	6.4
106	6061021901	51	86.5	1	5.1	43	73026	5.434
107	6061021501	53.4	80.2	1.5	15.6	42.3	56504	5.8875
108	6061022400	46.6	71.2	1.8	9.8	39.3	90081	6.68
109	6061022800	51.2	73	0.3	13.3	33.5	103531	7
110	6047000303	53.5	84.1	3.3	43.2	31.4	34306	5.72348
111	6061020604	51.7	83.1	0.8	6.3	41.2	101726	6.45
112	6061021103	43.7	89.6	1.6	19.7	32.8	62466	6.43333
113	6061021106	47.9	90.8	0.9	6.7	47.6	84112	6.8
114	6061022500	50.3	79.2	6.8	3.5	39.8	82250	7.82778
115	6061022600	47.4	80.3	0.8	6.9	27.3	58639	7.025
116	6047000504	51.5	63.3	3.6	77.9	28.1	36271	6.19
117	6047000304	50.1	53.7	0.1	72.8	27.2	42341	6.12222
118	6047000802	45.3	67.9	3.8	41.5	31.3	56090	6.4
119	6047001005	49.2	55.4	9	56.4	27.3	29792	6.4
120	6061023000	48.7	75.5	2.9	11.7	33.5	109097	6.825
121	6061023100	47	76.9	1.8	8	33	119813	7.28
122	6047000601	50.9	74.7	2.2	53.8	30.4	38569	6.075
123	6047000602	47.1	64.2	4.5	47.4	28.7	38109	6.2
124	6047000603	51.2	70	5	57.8	31.9	31148	6.16667
125	6047000801	52.5	74.2	4.5	48.6	29.4	46761	6.3
126	6047002000	50.7	86.3	0.4	57.9	28.9	42883	6.03717
127	6047000301	52.5	48	1	69.2	28.2	48664	6.40312
128	6061022013	47	96.2	0	4.3	49.4	59519	4.87692
129	6061020402	47.4	93.4	0	0.4	46.7	96029	5.96364
130	6061020502	47.4	95.9	0.9	1.4	52.6	63008	5.79032
131	6061020501	49.8	91.1	0.4	9.8	48.4	65192	5.90357
132	6061022900	50	75.3	4	17.8	30.6	76117	6.6
133	6061023600	41.2	92.8	0.2	4.1	69.6	63093	6.74
134	6061023400	48.9	90	0	17.9	32.8	95958	5.8381
135	6047000702	48.8	73.2	0.6	29	40.8	93547	6.06
136	6047002201	47.2	81.3	3.4	73.1	25.6	29250	6.42
137	6061021204	48.5	88.1	0.1	10	44.8	102708	6.0878
138	6061021123	48	87	1.3	9	41	95900	6.52667
139	6061021604	51.4	96.6	0	7	49	81250	5.45091
140	6061020717	47.8	64.8	0.5	18.8	36	68160	6.74
141	6061020806	47	87.7	1.5	19.2	40.6	50994	7.03333
142	6061023300	51.3	69	4.4	9.7	32	100232	6.4
143	6033000600	54.6	92.3	3.6	3.8	51.7	35275	4.4352
144	6033000702	48.1	77.3	4	18.9	43.5	27604	4.98255
145	6021010501	54.1	75.9	0.8	70.5	30.1	37500	5.35294
146	6021010100	50.2	81.7	0.4	43.9	30.6	40759	5.9
147	6021010200	50.1	89	0.1	35.6	39.6	44922	5.95
148	6021010300	50	81.1	2.1	13.9	47.5	61625	4.88847
149	6021010400	50.1	76.1	1.6	26.8	40.8	36992	6.128
150	6021010502	49.8	93.8	0.1	17	33.3	44315	5.05395
151	6055201800	51.7	92.6	0	24.9	45.7	74760	3.75819
152	6031001300	51.3	79.1	7	73.3	27.3	29405	5.17273
153	6031001500	50.6	81.2	1.1	77.6	32.9	37089	5.225
154	6031000500	49.4	82.5	4.7	59.4	33.1	43767	6.00811
155	6031001100	50.7	65.6	13.6	68.6	26.3	32347	6.65
156	6031001200	52.9	87.2	0.8	42.2	37.4	55179	6.3416
157	6031000602	50.4	86.9	6.9	20.1	34.3	74273	6.125
158	6031000701	46.8	79.9	4.6	30.1	38.9	64954	6.26
159	6031001001	51	72.2	4.8	35.3	34.8	70611	6.18571
160	6031000800	55	87.7	4.8	57	31.7	42235	6.70909
161	6031001003	54.9	83.4	5.3	65.3	30.6	55245	6.25714
162	6031001002	49.7	83.8	1.8	71.1	25.9	31645	6.2
163	6031000900	48.2	75.9	6.6	54.9	29.2	39196	6.4
164	6031000100	55.3	85.6	2.3	33.6	36.7	49795	6.16284
165	6031000200	55	83.8	1.2	40.7	36.8	43953	5.79198
166	6031000300	60.3	66.7	9.9	17.9	23.1	43180	5.82597
167	6031000601	51.3	70.5	6.1	33.2	30.6	89318	5.99
168	6031000702	50.9	89.6	0.1	39.5	35.4	54583	6.4
169	6031000403	51.2	65.9	8.2	38.3	28.7	54156	5.96667
170	6031000404	52.8	68	7.5	37.2	29.1	67102	5.9
171	6031000405	49.5	67.6	5.6	39.6	27.1	34654	6.08
172	6031000402	51.1	73.8	10.8	34.8	31.9	67083	6.12055
173	6031001402	52.2	63.5	4.4	82.6	28.4	26739	5.4
174	6031001401	48.4	77.2	3.4	90	26.8	36758	5
175	6101050603	44.7	78	1.9	5.7	43.9	66652	5.85385
176	6101050604	56	74.3	1.8	17.1	33.9	64583	5.66667
177	6101050900	54.6	74.4	1.1	30.2	43.1	56406	5.03368
178	6101051100	48.7	82.7	1.6	16.3	42.7	72604	5.38409
179	6101050800	48.4	89	0.7	12.6	39.1	62247	4.63746
180	6101050101	50.3	68.2	2.8	35.9	29.3	40710	5.68
181	6101050201	48	62.8	2.7	51	27.3	24153	5.6
182	6101050501	51.7	48.3	2.5	19	31.3	43804	5.6
183	6101050601	49.7	70	3	13.6	41.3	64484	5.7087
184	6101050504	52.7	55.8	1	20.6	37.3	63000	5.508
185	6101050102	45.3	74.5	1.6	41.3	32	30220	5.8
186	6101050202	50.6	78.1	0.9	46.1	29.8	29328	5.9
187	6101050503	51.5	55.8	1.6	25.8	39	63733	5.59
188	6101051000	50.5	79.4	2.2	28	41.2	47262	5.27761
189	6057000104	42	94.9	2.3	6.7	56.7	56146	5.76
190	6057000105	52	97.9	0	0.1	49.5	44896	5.374
191	6057000103	49.6	94.8	0	5.7	50.1	80156	5.47108
192	6057000200	51.1	95.6	0	1.9	52.1	67670	4.64279
193	6057000300	53.1	94.2	0	7.8	48.1	76210	5.56
194	6057000401	46.4	93.7	0	9.8	53.8	69615	5
195	6057000402	53.6	89	0.5	5.9	47.4	53576	4.80061
196	6057000501	42.6	92.7	0.6	17.2	43.6	45787	5.75714
197	6057000502	47.2	87.9	0.8	10.9	43.9	41657	5.72308
198	6057000600	48.8	92.8	0	9.8	45.7	30968	5.78125
199	6101050302	51.2	57.3	0.4	59	30.7	42313	5.75
200	6101050301	44.1	87	0	15	35.1	49375	5.75
201	6057000701	52.7	93.1	0.3	4	53.6	61713	5.25245
202	6057000702	49.7	92.2	0.6	2.8	55.9	52788	5.8
203	6057000102	46.2	94.6	0	11.1	50.5	69552	5.64167
204	6057000802	50.2	90.5	1	9	51.9	64194	5.40857
205	6057000801	51.9	93.2	0.3	2.3	53.1	55426	4.93681
206	6101050702	47	69.9	0.8	46.1	32.6	46140	5.55738
207	6101050401	48.8	66.1	0.8	23.9	36.1	58281	5.8
208	6101050403	51.5	56.8	3.7	24.7	31.3	78578	5.6625
209	6101050701	51.8	56.2	0	45.4	31	38380	5.39643
210	6101050402	43.7	69.2	6	9.7	34.7	63571	5.61818
211	6013308002	52.9	57.6	9.6	32.6	36.8	101935	4.98333
212	6043000200	51.1	93.7	0.5	11.8	52.1	47219	5.59214
213	6043000400	57.4	78.8	4.3	11.4	34.1	46364	5.0323
214	6043000102	47.8	92.3	0.6	6	51.9	51895	5.67714
215	6043000101	48.6	81.6	0.8	17.6	45	40417	6.05457
216	6043000301	50.6	91.2	0	5.4	47.9	59477	6.45989
217	6043000302	48.1	92	0	2.9	57.5	57328	6.05009
218	6013302006	55.6	80.5	4	42.2	30.9	80455	4.26875
219	6013304005	49	84.5	1.5	18.9	31.7	107969	4.63393
220	6013304002	51.4	85.7	6.9	18.5	38.3	72731	5.21455
221	6013303103	50.4	75.7	3.6	38.8	31.7	73781	4.84
222	6013302008	48	55.4	16.8	40.9	29	69855	4.76842
223	6013302007	55.5	65.7	8.2	49.5	33.6	70278	5
224	6013303102	50	70.1	7.7	34.3	31.5	86724	4.975
225	6013302005	50.3	65.5	6.4	41.5	38.4	53433	4.75
226	6013302010	48.3	78.8	4.7	29.4	33.5	93295	5.05714
227	6013302009	52.1	27.3	32	27.4	30	85764	5.025
228	6013306002	52.5	62.4	5.8	26.4	39	62926	4.41
229	6013303203	48.2	65.3	11.9	17	36.4	94205	4.82222
230	6013303204	51.2	86.6	0.2	40.4	33.3	62336	4.7
231	6013303205	46.5	78.7	3.6	16.5	53.9	82976	4.76
232	6013304003	51.2	85	8.3	10.6	49.1	78026	4.8
233	6013301000	49.8	84.4	2.1	23.9	50.2	49694	4.55147
234	6013304004	53.7	95.8	0	2.9	49.1	120488	4.78
235	6013303202	52	80	2.5	24.1	35.8	106808	4.7
236	6013306004	48.3	73.9	12	34.4	36.1	47313	4.25
237	6109004200	51.6	95.1	0	5.9	57.5	47684	4.12958
238	6109001100	51.4	88.8	4.3	4	44.7	51153	6.04167
239	6109001200	54.1	84.5	1.6	7	42.6	32273	5.86
240	6109005100	47.4	92	0	12.8	46.9	42690	5.70876
241	6109005201	75.1	58.4	12.6	24.4	39.9	62750	5.16217
242	6109002100	51.7	85.3	0	7	47.9	49821	4.74227
243	6109003200	51	90.4	0	8.5	46.3	49968	4.49313
244	6109002200	48.2	96.3	1.5	9.1	50.3	54335	5.41035
245	6109004100	44.7	91.6	0	11.6	54.1	49003	5.68105
246	6109003100	50	90.3	0.1	7.6	50.9	51654	4.21607
247	6113010302	47.7	59.9	7.7	22.7	32.9	86250	6.01538
248	6113010310	48.7	67.2	5.2	29.2	29.2	77216	5.775
249	6113010312	44.2	76.3	3	25.3	39.1	66371	5.95
250	6113010402	47.7	52.1	12.4	15.4	32.6	105377	5.8375
251	6113010511	45.9	67.2	0.8	4.3	30.2	85112	6.4
252	6107003601	49.6	83.4	0.4	53.7	31.2	53125	5.575
253	6113011205	47.7	63	0.2	57.4	30.6	72500	6.175
254	6113010501	45.4	45.6	1.8	13.8	19.5	26522	6.45
255	6113010607	53.5	69.5	0.8	11.7	37.8	95956	6.16667
256	6113010512	43.9	60.3	0.7	23.3	22	70208	6.25
257	6113010513	45.6	74.1	1.4	8.7	24.4	44840	6.4
258	6107002901	51.3	72.3	6.3	74.3	29.6	27632	6.48333
259	6113010606	50.2	74.5	3.5	16.2	32.6	68884	6.175
260	6113010505	45.3	69.9	0.9	13.3	33.4	109191	6.21056
261	6113010508	50.3	81.4	2	7.2	31.6	81806	6.46667
262	6107001704	55.3	77.2	6.3	41.2	27.2	57568	6.83333
263	6113010602	45.6	61.5	8.6	15.1	24.4	33540	6.45
264	6113010701	43.8	73.3	0.9	9.5	23.3	41212	6.5
265	6113010703	42.4	47.6	1	13.7	21.5	43500	6.1
266	6107003902	48.8	81.4	0.1	69.4	26.9	34620	5.65
267	6107002100	56.1	88.6	0.1	58.9	28.4	48917	6.63194
268	6107003100	50.3	84.8	3.7	54.8	30.4	38060	5.72747
269	6107002302	50.9	81.9	5.1	33.1	35.6	58989	6.9
270	6113010704	59.6	72	0.7	12.3	25.3	72604	6.3
271	6113010102	51.2	71.5	3.3	40.7	34.5	39305	5.90513
272	6113010203	49	55.1	2.4	50.6	30.5	26564	5.88462
273	6113010101	47.4	59.6	4.3	36.1	28.7	35139	6.04
274	6107002904	49.7	76.8	5.7	53.3	29.9	55018	6.6
275	6107003001	56.1	77.2	6.1	79.6	23.4	34727	6.6
276	6113010201	46.6	79.7	3.7	15.4	47.5	51481	6.1
277	6113010204	52.5	65.5	1.9	38.6	38.1	43229	6
278	6113011500	47.8	62.8	6.8	45.4	40.6	55403	5.17008
279	6113011400	56.9	70.5	3.9	44.5	37.4	49559	5.96224
280	6113011300	47.3	75.3	0	46.1	34.5	61696	5.81294
281	6107002903	47.2	79	6.3	52.5	26.3	45926	6.6
282	6107004300	49.8	69.4	0.7	87.6	22.9	28472	6.89436
283	6107002303	42.8	92.8	0.4	30.7	42.8	45714	6.9
284	6107003002	51.5	85.3	5.1	75.1	25	41222	6.325
285	6107002006	47.6	91.9	2.3	19	39.8	76464	6.75
286	6113010510	55.1	57.1	0.7	7.2	24.5	65532	6.3
287	6107000100	48.1	85.3	0.4	23.1	46.8	55202	3.72263
288	6107000302	54.1	79.9	0.2	86.8	25	31833	6.14211
289	6107001003	52.3	79.8	0.5	45.8	29.9	85724	6.65
290	6113011204	47	78.4	0	36.5	37.6	72737	6.225
291	6113010800	47	81	0.9	58	35.1	45890	6.15
292	6113011101	49.3	72.2	0.4	52.5	36.8	56750	6.2
293	6113010902	48.6	64.7	3.1	53.2	30.5	39880	5.83333
294	6039000506	51.5	83	1.5	70.1	31.3	54205	5.8
295	6107001602	51	86.3	0.1	75.2	30.1	31856	6.795
296	6113011001	50.4	80.4	0.4	36.9	39.2	38247	5.85
297	6113011002	41.4	89.4	0.6	19.3	50.5	69844	6.15
298	6039000502	50.5	83	2.2	79.3	23.7	44667	5.97143
299	6039000503	50.9	80.1	2.2	54.4	30.7	59879	5.79301
300	6039000507	50.3	80.7	2.5	74.7	27.1	55625	4.74286
301	6039000700	46.7	78.1	5.8	50.9	36.2	56744	6.16667
302	6107002202	51	77.3	9	73.1	25.2	27595	6.6
303	6113011203	51.5	80.7	0	21.3	46.3	86019	6.3
304	6113011206	53.2	68.3	1	33.3	34.7	86940	6.09204
305	6113010605	50.9	62.3	0.1	12.4	35.3	131176	6.16667
306	6113011103	53.2	60.7	3.3	47.8	30.6	62100	6.15
307	6107003200	53.6	88.5	0	79.1	25	35072	5.47378
308	6107004500	49	71.3	0.3	76	28.2	31616	6.44211
309	6107004200	53.6	83.9	4.8	76.5	23	26006	6.07623
310	6107000900	56.1	81.7	1.9	72.4	27.1	34453	6.69275
311	6107002204	46.6	79.6	5.6	68.2	29.3	35471	6.75
312	6113011102	50.4	67.4	2	63.7	31.4	40719	6.15
313	6113010608	57.5	51.7	1.6	14.3	22.7	52289	6.2
314	6039001000	53.4	84.7	0.7	60.9	36.2	48571	6.07076
315	6039000508	51.8	74.9	2.7	53.8	34.9	45403	5.93333
316	6039000400	52	82.8	0	58.5	36.6	33750	5.22827
317	6039000102	50.7	78.7	1.3	9.2	45.4	53324	2.92936
318	6039000103	48.6	93.9	0.4	9	52.3	42000	3.63198
319	6107000800	53.7	80.5	0	67.6	29.8	41480	6.24375
320	6107003300	49.8	81.9	0.1	73.7	27.5	34991	5.81508
321	6107002400	50.4	77	1	43.9	30.9	67610	6.28795
322	6107003502	52.7	74.2	0.7	64.6	29.5	67324	5.52222
323	6107003501	52.5	76.5	0	44.6	28.9	72250	5.5625
324	6107002203	46.8	83.1	6.3	61.1	28.4	65388	6.6
325	6039000109	51	82.4	0	10.7	54.3	50809	4.85
326	6039000202	46.9	85	2.4	41.5	34.3	68523	5.56934
327	6107002007	50.9	80.9	3	34.5	34.4	53004	7.06061
328	6107002700	51.2	74.1	0.5	19.9	50	46888	3.22211
329	6107002500	48.3	84.6	0.6	57.1	33.3	54147	6.47619
330	6039000201	10.1	51.4	23.1	39.5	37.2	51705	5.39213
331	6039000300	48	76.3	1.5	40.2	35.2	32346	5.44545
332	6107002304	42.6	92.6	4.1	41.3	33	37554	6.9
333	6107003400	50.2	85.9	0	57.5	33.8	38650	5.51325
334	6113010401	49.3	79.6	0.7	21.3	40.9	81197	5.87181
335	6095252913	52.2	65.6	11.9	18.3	37.9	84604	6.26667
336	6095253205	52	50.7	5.9	24.6	29.4	76477	6.96667
337	6095253204	47.4	66	4.4	32.4	30.3	70536	6.925
338	6095253404	49.9	69.5	2.1	44.6	29.8	62853	6.73333
339	6095252315	45.3	41.8	16.8	11.3	44.2	93125	6.1
340	6095252706	51.2	49.7	19.9	24.2	33.2	91412	6.05
341	6095252707	49.1	43.5	20.6	28.3	37.3	53750	6.075
342	6095252914	54.7	60	10.5	24.4	31.3	80885	6.425
343	6095253500	47.6	76.9	6.7	14	57.6	61720	5.15877
344	6095252903	46.6	83	2.6	13.2	47.4	122396	6.36298
345	6095252904	49.4	63.6	6	22.6	40	91411	7.14328
346	6095252910	46.8	74.7	7.9	19.8	36.2	84191	6.9
347	6095253101	48.2	76.3	6.1	20.9	38.2	53449	6.5125
348	6095253201	48.4	85.2	4.7	18.8	45	90993	6.56667
349	6095253203	51	81.4	1.4	28.6	35.7	61919	6.8
350	6095252909	48.3	82.2	2.6	24.7	37.3	79565	6.8
351	6095253105	46.9	57.9	11.9	32.3	29.4	53712	6.66667
352	6095253108	62	52.3	16.2	24.8	40	65878	6.18
353	6095253107	51.9	57.1	6.2	32.3	32.3	54547	6.4
354	6095253300	53.2	75.5	1.3	40.9	40.5	70340	6.23671
355	6095252313	49.2	51.5	12.9	15.6	41.9	64153	5.95556
356	6095252317	48.7	37.1	15.6	15.2	32.8	105608	6.00811
357	6095252915	51.8	58.8	7.4	19.6	36.2	108523	6.36842
358	6095252911	38.5	84	4	9.4	64.3	46020	7.02
359	6095253206	53.6	83.2	2.6	16.1	36.3	128708	6.9
360	6095253403	50.3	75.4	3.5	45.2	35.3	82844	6.74444
361	6095252801	70.4	72.2	9.4	17.1	22.3	55083	5.9
362	6095253402	48.7	78.9	0.7	41	36.5	61918	6.50476
363	6095253106	46.2	75.8	7	21.3	30.6	66167	6.55
364	6095252610	46.2	49.7	27	24.9	33.6	62132	6.1
365	6095252802	63.2	65.7	21	12.4	21.6	56458	5.78
366	6095252912	46.6	73.3	6.1	10	40.6	113889	6.9
367	6099003907	46.7	82.7	3.6	18.9	43.3	64869	6.6
368	6099003500	49.8	79.3	0.4	63.9	29.4	47530	6.03684
369	6099000503	48.5	77.1	1.9	36.9	30.2	53542	5.9
370	6099000805	48.3	75.5	5.2	33.2	35.5	41027	5.95
371	6099000501	50.8	75.3	3.1	34.2	37.8	80591	6.12558
372	6099001001	46.9	87.7	2	27.5	42.2	42742	6.53333
373	6099002004	48.2	73.2	12.5	44.2	27.1	35381	6.425
374	6099001100	46.9	82.9	1.3	31	36.7	31855	6.5
375	6099003202	52.7	64	12.3	48.6	31	62664	6.21
376	6099000909	47	77.4	1.1	34	31.4	42734	6.5
377	6099001900	47.8	82.5	4	27.3	33.8	41159	6.6
378	6099000910	50.5	77.2	7.6	32.6	32.4	40992	6.5
379	6099000801	48.3	83.8	2.8	20.8	46.1	55740	6.3
380	6099001300	47.6	89.1	1.2	16	41.5	62248	6.14
381	6099000807	46.3	73.4	1.3	25.7	38.2	53550	5.9
382	6099003904	47.2	81.9	0.2	45.6	37.4	31618	6.56667
383	6099000403	44.4	88.1	1.1	12.3	42.3	60863	6.48
384	6099000806	47.3	72.4	3.7	37.1	37.5	46393	6.1
385	6099001200	48.6	75.1	4.3	26.8	34.3	42188	6.6
386	6099003300	53.6	88.6	3.3	63.9	34.1	49191	6.64513
387	6099002302	51.4	74.4	0.2	78.5	29.1	30953	6.25
388	6099000301	48.6	70.5	2.5	57.1	30	34744	5.55
389	6099003908	46.2	85.4	1.9	29.2	30.6	33488	6.6
390	6099000908	48.2	79.6	8.6	30.8	31.1	50625	6.5
391	6099002301	50.5	69.3	4.1	76.7	26.2	31171	5.88333
392	6099002002	47.8	86.3	0	52.4	31.4	31662	6.11
393	6099000404	47.8	75.2	5	20.2	39.8	51533	6.25
394	6099003909	47.7	85.7	0	24.5	35.7	44717	6.4
395	6099003905	48.5	94.8	0	16.4	44.2	73188	6.7
396	6099003803	44.9	70.5	0	62.1	28.9	35050	6.6
397	6099002604	48.4	67	4.4	51.1	26.6	26429	5.9
398	6099002603	49.8	83	2.4	37.9	37.4	58892	6.2
399	6099001700	57.7	68.3	7.1	76.6	29.4	25481	5.9
400	6099000402	51.8	78.5	2	35.1	34.7	72452	5.88043
401	6099002902	45.7	80.4	1.7	44	33.3	49272	6.19231
402	6099001603	49.2	66.2	4.4	63.2	28	34368	5.53333
403	6099003906	44.5	76.5	3.2	40.5	33.3	24375	6.6
404	6099001500	48.7	78	1.5	53	29.9	40519	5.84615
405	6099000202	52.6	82.1	1	25.3	31.9	57070	5.06
406	6099003100	56.6	89.7	0.7	43.8	29.3	41462	5.67737
407	6099002100	55.2	84.6	0.3	72.3	31.5	19734	6.4
408	6099000907	49.8	92.6	1.4	14.3	47.4	61488	6.5
409	6099000510	52.3	85.5	1.6	47.5	31.4	64939	5.92222
410	6099002504	48.4	74.4	1.1	64.7	31.2	55603	5.925
411	6099002503	53.5	83.5	1.5	58.2	33.1	30446	6
412	6099002006	47.9	68.9	3.3	34.9	29.6	54920	6.2
413	6099002005	50.5	74.2	2.1	52.1	28.8	48106	6.6
414	6099002402	50.7	64.9	0.1	89.7	27.3	30906	5.9
415	6099000304	50.2	88.9	1	72.6	28.3	43902	5.425
416	6099000303	53	77.2	2	55.9	30.5	61000	5.66667
417	6099003002	53.1	76.9	0.8	52.2	30.1	34905	5.9871
418	6099003606	51	72.4	2.8	25.3	30	86328	6.55
419	6099003805	58.2	72	1.5	34.2	26.4	56274	6.25
420	6099003804	50.7	80.9	1.4	56.6	32.4	43244	6.48
421	6099003605	53.9	83.4	0.7	19.3	29.7	60154	6.54
422	6099004000	48.7	90.8	0	29	39.9	61914	5.88201
423	6099002901	50.5	88.8	0.4	26.3	43.8	56801	4.48601
424	6099002801	52.1	88.4	0	35.9	33.7	62237	4.4924
425	6099000505	49	60.7	1.7	34.9	29.4	54552	6.12
426	6099000911	46.7	81.2	3	31	35.5	62639	6.45
427	6099000803	47.8	73.8	8.5	54.1	32.8	36086	5.93333
428	6099003001	49.4	67.3	0.7	51.3	30.2	68095	6.28571
429	6099003700	52.7	79.8	3	48.7	31.5	52770	6.17234
430	6099003604	48.1	90.9	0.2	31	39.3	74981	5.74272
431	6099000905	46.3	73.9	8.5	22.1	39.3	64375	6.5
432	6099000101	46.5	91	0.7	15.7	44.2	66034	4.70118
433	6099000506	49.3	72.8	3.5	26.6	38.5	39196	6.24
434	6099000912	45.5	66	4.3	25.1	32.5	85408	6.3125
435	6099000601	50.5	74.2	3.4	37.7	32.4	73594	5.9
436	6099001002	48.1	85.6	1.7	20.9	39.3	36250	6.55
437	6099000602	50.9	73.4	4.2	38.7	35.2	63029	5.88
438	6099000504	47.3	59.6	4.7	25.1	36.4	73267	6.02
439	6099000102	50.5	93	0.2	21.7	43.5	75855	4.7748
440	6099002200	48.4	64.6	6	66.8	26.9	23189	6.15
441	6099002803	49.6	75.5	3.2	31.3	33.8	57031	5.93333
442	6099000302	51.3	78.4	7	54	33.3	43029	5.5
443	6099002702	47.1	67.9	0.2	67.4	30	44405	6.2
444	6099000203	48.2	87.1	0	31.3	33.6	52458	4.77692
445	6099001800	57.6	71.9	11.9	27.1	37.3	16927	6.25
446	6099002802	49.5	86.3	0.1	37.6	34.3	52662	5.41776
447	6099003603	53.5	88.2	0.1	37.7	34.2	41573	5.86118
448	6099000906	43.4	83.3	1.5	25.6	37.4	55439	6.55
449	6099001604	52	55.8	3.4	73	22.4	21556	5.8
450	6099000201	48.4	97	0.2	16.8	40.6	63173	5.04286
451	6099003802	49.8	88	0.6	68.9	26.8	29892	6.5
452	6099003201	49.3	73.3	2.3	75.2	27.9	41615	6.025
453	6099002501	52.9	64.6	4.6	68.5	28.3	52408	5.84
454	6099002701	50	72.1	0.3	44.5	44.7	57708	6.35
455	6099001400	50.1	63.3	2	42.9	32.1	33479	5.93333
456	6099001601	48.6	68.3	4.3	72.9	26.8	27998	5.83333
457	6099002605	47.7	83.6	0.3	41.1	32.7	36513	6.3
458	6099002602	49.8	78.3	2.7	49.2	31.1	33018	6.2
459	6067008912	48.8	72.9	8.8	19.9	38.3	66199	6.75
460	6067008905	51.1	59.2	6.6	25.7	34.6	44049	6.85
461	6067008907	50	65.3	9.1	20.2	34.1	40038	6.8
462	6067008908	47	81.7	7.1	17.6	41.9	50016	6.725
463	6067008132	44.5	84.9	2.3	7.9	45.5	60682	7.43333
464	6067008141	47.6	73.1	3.6	28.3	28.7	39573	7.1
465	6067008111	46.1	88.9	0.5	14	39.8	66000	7.3
466	6067008113	45.3	83.5	0.8	26.2	31.9	51522	7.5
467	6067001800	49.6	53.8	16.8	23.7	32.3	40554	6.15
468	6067001900	50.6	70.5	11.1	28	32.1	43867	6.15
469	6067002000	50.9	52.3	2.4	15.7	37.4	31604	6.1
470	6067002100	56.6	53.4	1.8	30.1	28.2	37178	6.1
471	6067009609	49.6	29.9	21.2	25.6	28.3	64167	6.1
472	6067007107	55.3	35.1	22.5	15.5	34.7	87286	5.88125
473	6067007428	54.7	62.2	8.4	17.9	35.5	54051	7.45
474	6067009004	48.8	67.2	11.6	16.1	34.8	59375	6.4
475	6067009006	47.9	71.8	10.4	17.4	35.1	38063	6.53333
476	6067009103	49.8	62.1	14.4	19.7	32.7	55844	6.45
477	6067009318	52.2	34.5	14.7	26.2	28.8	58250	6.3
478	6067008127	51	86.8	2.3	24.7	31.8	59570	7.43333
479	6067008134	47.9	74.1	9.1	15.2	32.8	47730	7.3
480	6067008211	50.3	89.8	0	9	47.3	91746	6.425
481	6067002200	42	52.2	25.9	18.5	36.2	27725	6.125
482	6067002300	42.8	82.5	0.4	9.1	42.2	72321	6.2
483	6067002400	43.4	77.6	1.1	10.5	45.2	100617	6.25
484	6067002500	48.2	84.9	4.1	7.9	46.6	104615	6.2
485	6067009608	45.6	24.8	20.3	11	32.5	57413	6.075
486	6067009611	46.9	44.8	14.6	26.7	28.1	65929	6.15
487	6067005508	45.3	65.3	11.6	15.4	33.9	46768	6.5
488	6067007422	48.1	77.2	6.9	18.8	28	48125	7.5
489	6067008509	48.1	67.5	1.1	13.3	38.8	125246	6.13333
490	6067008512	52.2	67.7	1.4	8.3	34.5	149750	5.85
491	6067009108	47.1	65.4	4.8	11.7	38.8	62330	6.5
492	6067009110	43.6	36.9	39.7	21.9	26.6	24549	6.5
493	6067003000	41.9	66.3	6.2	23.7	42.2	62539	6.225
494	6067003202	50.5	42.8	12	28	37.4	34053	6.4
495	6067004401	43.7	38.1	18.2	37	30.1	28940	6.2
496	6067008120	52.1	81.7	3.8	18.3	31.5	51202	7.2
497	6067008138	47.5	76.8	4.4	23.3	40.9	62712	7.03333
498	6067009321	52.1	39.5	16.8	18.8	33	71479	6.3
499	6067008124	50	91	1.5	11.6	46	74750	7.15
500	6067002600	44.2	80.4	6.3	20	39.4	77973	6.3
501	6067002700	46.7	46.4	29.8	23.3	32.9	28523	6.2
502	6067002800	41	21.4	28	29.4	31.7	33636	6.2
503	6067002900	49.3	66.4	9.3	23.9	38.9	50827	6.2
504	6067003101	52.9	53.9	4.5	44.7	35.7	40081	6.3
505	6067007421	51.6	68.7	7.5	14.9	34.9	81653	7.6
506	6067007424	43.8	61.7	23.5	9.3	29.4	42061	7.2
507	6067008131	47.5	83.5	4.6	13.7	37.6	48472	7.33333
508	6067008513	47.4	66.7	1.5	10.1	31.2	116654	6.06667
509	6067008703	50.1	60.7	6.7	9.5	42.4	79659	6.64
510	6067009011	48.6	64.4	2.5	15.9	32.2	88317	6.78333
511	6067009325	45.2	83.8	0	6.1	33.5	71061	6.5
512	6067009407	48.2	64.1	1.6	43.4	30.9	62154	5.9
513	6067004402	45.3	40.1	12.3	58.1	27.4	29388	6.2
514	6067004601	51.5	45.9	11.1	45.4	29.4	30069	6.3
515	6067004801	47.2	26.9	15.8	21.1	30.3	31154	6.3
516	6067008125	46.8	85.8	0.1	17.1	40.5	72768	7.125
517	6067008005	49.9	89.4	0.2	9.3	48.3	98526	6.76667
518	6067008006	45.7	85.9	2.7	8.9	47.3	74883	6.8
519	6067008007	47.6	82.4	3.2	18	40.6	45100	7.3
520	6067008008	49.6	88.9	0.3	13.7	47.4	91161	7
521	6067003102	50.3	60	5.5	51.5	33.6	51719	6.2
522	6067003300	46.2	65.3	1.4	17.1	51.4	69137	6.23333
523	6067003400	41.1	53.7	15.9	23.5	45	55700	6.16667
524	6067003501	48.2	73.3	5.9	33.6	38.1	49063	6.3
525	6067003502	43.8	62.4	1.2	27.4	42.5	54929	6.2
526	6067008144	50.2	92.9	1.6	17.1	38.4	74611	7.1
527	6067009112	49.2	67.2	10	14.9	31.5	62830	6.6
528	6067009622	51.6	45.9	14.4	14.1	35.9	106588	5.925
529	6067009637	50.1	24.4	11.1	10	32.5	94727	5.96667
530	6067988300	99.8	30.4	41.9	24.7	35	78333	6.3
531	6067007001	44.4	49.8	3.8	60.1	27.2	34670	6.5
532	6067008504	46.8	76.8	1.7	4.2	34.4	112148	6.38
533	6067007501	44.5	76.2	4.8	22.4	31.7	36340	7.3
534	6067009319	46.1	26.5	15.8	23.1	30.4	52825	6.3
535	6067008129	51.6	87.4	2.4	14.4	39.3	54297	7.4
536	6067008136	44	80.3	4.7	5.4	43.1	49000	7.1
537	6067003600	48.2	67.8	5.5	56.4	37.1	35648	6.2
538	6067003700	48.2	28.9	17.9	41.7	28.7	25161	6.2
539	6067003800	50.3	48.8	20.9	32.5	31.9	51845	6.18
540	6067003900	47.3	55.3	8.7	14.5	46.4	56667	6.13333
541	6067009320	48.7	43.3	13.2	29.1	29.8	55703	6.3
542	6067009501	48.5	68.2	0.2	58.1	35.9	45637	5.9439
543	6067009614	48.7	39.7	10.7	19.3	31.8	65703	6.1
544	6067009615	46.3	50.7	12.2	24.5	31.9	67808	6.1
545	6067005301	51.8	41.1	35.1	27.7	32.5	14609	6.075
546	6067007018	52.2	36.2	11.7	14.5	29.5	56891	6
547	6115040400	48.5	65.3	1.7	30.7	29.9	31691	5.76818
548	6115040700	50.9	63.7	4.7	26.1	29.7	73592	5.52143
549	6115040901	49.5	78.1	0.8	16.2	37.6	55903	4.77067
550	6115040902	63.6	76.7	6.8	8.5	22.6	37697	4.5562
551	6115040100	54.4	65.4	7.7	32.5	29.4	32626	5.9
552	6115040200	49.9	79.1	4.6	26	32	42028	5.675
553	6115041000	49.6	84.7	0.7	6.5	49.3	73136	4.68105
554	6115040500	50.2	66.7	1	52.2	33.2	33019	5.65
555	6067007202	45.4	54.7	4.7	28.7	37.8	53818	6.97
556	6067007414	48.8	58.2	9.4	21.5	29.4	37275	7.5
557	6067007417	53.2	74.9	11.8	10.8	31.8	63250	7.625
558	6067008133	47.2	76.5	3.4	10.5	37.6	23496	7.3
559	6067008135	43.9	76.1	3.2	13.4	43.9	42835	7.1
560	6067008117	53.3	85.9	2.4	9.4	40.2	56573	7.3
561	6067008119	46	79.3	0	15	42.4	65556	7.225
562	6067004001	48.2	46	16.8	17.2	47.5	56891	6.2
563	6067004004	47.5	56.8	6.7	13.3	47.5	85960	5.875
564	6067004005	51.4	52.7	19.1	13.9	47	57554	5.95
565	6067009617	50	69.2	7.9	17.4	45.3	95300	6.15
566	6067009616	49.2	61.1	6.8	23.7	36.3	81540	6.2
567	6067009612	50.6	46.4	7.5	24.9	32.3	72909	6.15
568	6067007019	46.8	24.3	15.9	26.6	23.6	19844	6.36667
569	6067007101	56.5	96.2	3.8	0	33.3	75625	6.15494
570	6067007103	55.3	45.3	5.3	25.8	29.9	71964	6.3
571	6067007104	52.1	46.6	12	19.9	31	86294	6.36667
572	6115040600	50.6	64.7	0.9	23.2	26.6	43022	5.65
573	6115040800	48.5	72.4	1.1	22.8	34.7	60682	4.99841
574	6115041100	53	86.6	2.2	8.3	48.3	46087	3.48223
575	6067008145	52.2	90.1	0.8	6.8	40.1	71997	7.1
576	6067008139	42.9	76.3	9.9	20.8	32.8	39387	7.05
577	6067008122	52.2	85.9	2	14.3	40.3	72188	7.03333
578	6067008009	48.7	84.1	1.4	9	46.5	61786	6.96
579	6067008010	48.5	83.3	0.8	3.3	43.4	63762	6.97143
580	6067008128	49.9	92.2	0	8.9	39.4	58922	7.4
581	6067004006	42.8	46.6	27.5	19.3	37.1	50638	6.16667
582	6067004008	48.2	58	5.3	13.9	45.3	85037	5.93333
583	6067004100	49.7	38.3	11.7	26.7	36	28565	6.1
584	6067004201	49.5	42.1	26.5	30.3	34.7	47967	6.06667
585	6067008209	49	88	1	9.7	46.5	81507	6.43333
586	6067009323	50.5	50.9	11.3	17.4	42.2	88469	6.16
587	6067008130	42.8	78.7	9.5	9	33.9	64142	7.45
588	6067007105	48.3	47.8	12.6	23.8	29.9	69946	6.55
589	6067007426	46.6	58.8	19.6	10.5	30.1	49710	7.4
590	6067007427	44.8	66.3	11.3	12	28.2	48902	7.55
591	6067008910	49.4	73.9	4.1	19.1	40.4	54203	6.9
592	6067008206	47.1	91.3	3	5.9	34.7	68125	6.775
593	6067009601	49.2	29.1	28.7	20.2	30.6	54334	5.95714
594	6067004802	49.8	42.6	17.1	38.8	24.9	33790	6.3
595	6067005001	49.4	41.5	14.2	41.3	34.4	45817	6.3
596	6067005002	45.3	38.8	20.2	27.3	34	25370	6.325
597	6067005101	53.9	49.4	15.4	35.4	31.6	36627	6.3
598	6067005102	49	54.3	9	31.3	37.5	47929	6.2
599	6067004202	42.3	34.2	20.2	34.1	31.9	36265	6.25
600	6067004203	46.7	29.3	10.4	33.8	26.1	26520	6.15
601	6067004300	47.5	30.7	21.7	25.5	26.4	44287	6
602	6067004903	46.9	26.5	26.1	18.9	30.4	30902	6.1
603	6067004905	46	45.3	28.7	50.5	28.8	27922	6.3
604	6067008403	48.6	72.3	5	10.5	32.5	79572	6.33333
605	6067008913	54.3	69.7	8.9	15.1	33.9	52279	6.9
606	6067007430	46.5	69.1	10.9	18	31.1	64073	7.8
607	6067007431	51.2	59.4	2.9	13.6	32	81500	7.8
608	6067007432	43.6	74.7	13.6	11.9	33.3	84871	7.8
609	6115040301	46.2	63.9	2.6	31.1	26.9	23824	5.76667
610	6115040302	49.6	67.2	1.1	41.9	27	35093	5.7
611	6067009900	48.6	68.5	0	39.3	40.8	61220	5.74199
612	6067009800	46.5	82.4	0	33.7	52.1	39803	4.81061
613	6067009618	47.3	45.1	12.4	15.2	34.8	71844	5.82941
614	6067009311	50	42.9	9.3	16.4	31.8	71861	6.52857
615	6067005402	49.3	65.5	15.6	19.3	27.6	37530	6.36667
616	6067005404	47.8	85.8	2.5	14.5	47.4	65000	6.475
617	6067005502	46.2	51	15.7	38.5	31.5	30788	6.425
618	6067007415	48.3	66.4	9.9	27.3	41.6	58015	7.45
619	6067008140	48.4	86.3	4	13.4	37.2	63300	7.1
620	6067007207	48.2	86.9	0.3	11.1	36.2	53641	7.06
621	6067007402	47.6	69.9	8.4	30.6	35	51838	7.34
622	6067004906	43.1	21.5	40.4	18.4	32.4	49292	6.1
623	6067005201	47.4	51.5	16	29.1	21.3	19808	6.23333
624	6067005202	47.3	76.1	6.4	20	33.6	61393	6.55
625	6067007012	43.3	50.3	20.2	33.4	37.7	54099	6.05
626	6067007504	47.3	81.2	10.8	10.6	42.8	54427	7.13333
627	6067009316	51.4	37.3	9.9	17.3	30.8	63750	6.25
628	6067009317	49.7	47	16.3	21.2	32.8	69278	6.3
629	6067007433	46.3	55.7	9.9	6.3	28.7	68700	7.625
630	6067008505	43.4	73.3	0	9.4	41.3	115324	6.35
631	6067008507	50.4	72.8	0	15.1	34	93056	6.275
632	6067008508	51.7	68	4.7	16.7	33.6	103592	6.21304
633	6115040303	50.2	60.2	1.4	32.3	29.5	56204	5.67143
634	6067009314	48.6	40.1	9.9	10.7	31.8	72354	6.37143
635	6067007011	49.6	39.4	21.9	43.4	25.6	47955	5.925
636	6067009307	48.8	73.8	3.8	15	38.7	81738	6.35
637	6067009308	50.2	60.7	3.7	22.2	36.1	54793	6.275
638	6067009309	49.4	86.8	1.7	10.8	46.3	68798	6.25
639	6067006101	50.5	70.2	16.1	12.2	41.9	28451	6.825
640	6067005506	45.5	47	22.7	32	27.6	30850	6.3
641	6067007416	45.6	77.5	6.6	17.1	40.2	50202	7.35
642	6067005601	37.7	69.7	15	10.9	43.1	37049	6.66667
643	6067005605	54.6	65.2	5	34.5	32.3	36270	6.4
644	6067005606	46.1	76.9	9	13.3	39.6	53514	6.53333
645	6067007403	53.7	66.2	9.1	24.8	32.7	48774	7.13333
646	6067007406	50.9	60.2	14.9	19.4	33.1	40028	7.33333
647	6067005403	46.6	83.1	0.7	6.2	58.6	72500	6.6
648	6067006300	52.3	58	9.2	38.6	33.2	34358	6.6
649	6067006400	48.7	60.7	6.7	32.7	28.7	33214	6.88
650	6067006500	51.9	32.6	18.3	34.7	27.9	34090	6.7
651	6067009312	49	38.3	14.7	17.3	29.7	64045	6.45
652	6067008510	48.8	83	1.4	7.3	41.8	103737	6.11667
653	6067008704	50.7	55.7	1.4	13.7	30.4	91639	6.8
654	6067008705	49.8	43.9	9.3	12.8	32.5	102500	6.67826
655	6005000200	50.4	92.5	0	11.4	53.5	49034	5.51455
656	6005000301	83.6	65.5	14.4	28.5	42.3	60391	5.90655
657	6005000401	49.1	91.4	0.6	9.6	49.7	44570	6.046
658	6005000500	44.2	98.6	0	7.4	50.6	55969	5.9313
659	6005000402	49.3	91	0.7	8.9	51.5	54120	5.64382
660	6005000102	48.6	89.5	0	7.8	52.4	47875	4.44991
661	6005000303	49.5	90.9	0.1	8.1	42.5	56120	5.84625
662	6005000101	43.6	93.6	1	3.4	60.3	56136	4.91781
663	6005000304	53	94.7	0	15.9	40.8	54045	5.5105
664	6067009310	49.8	72.5	3.6	22.2	35.9	66620	6.3
665	6067009322	46	26.9	13.3	26.6	30.4	68047	6.25
666	6067008600	47.4	80.5	6.2	6.6	49.2	100375	6.13511
667	6067009404	46.5	76.8	1.6	15.3	48.6	95228	5.96394
668	6067008210	49.1	91.5	2.7	4.4	50	79212	6.24286
669	6067005701	43.3	82.4	7.3	4.7	46.8	85637	6.65
670	6067005702	48.3	87.6	1.9	4.2	41.2	120850	6.625
671	6067005801	48.1	82.9	2.9	5.7	46.9	60299	6.85
672	6067005803	49.3	86.7	0	6.7	50.5	113000	6.6
673	6067007413	52.9	64.1	8.3	22.3	32.1	33268	6.9
674	6067008208	53.6	86.3	2.3	12.1	37.7	46790	6.74
675	6067008143	51.6	83.2	3.9	20.1	32.6	54250	7.35
676	6067006600	50.6	44.9	18.1	40.6	29.3	29180	6.6
677	6067006701	48.9	34.6	9.6	38.2	26.5	45391	6.525
678	6067006702	49.6	35.8	19.6	31.9	27	34264	6.6
679	6067008801	46.1	56.9	13	19.2	31.5	80556	6.68065
680	6067009010	53.7	44.5	15.9	18.6	30.4	47474	6.7
681	6067009324	45.6	68.1	3.8	9.5	43.9	133047	6.675
682	6067009326	51.8	63.7	4.5	12	36.3	110716	6.85
683	6067005505	47.1	55.9	12.9	32.2	33.3	33734	6.63333
684	6067008402	49.1	92.6	0.4	11.7	39.5	75781	6.36667
685	6067009406	52.5	73.5	2.3	23.1	43.4	86389	5.76576
686	6067007206	52.2	84.4	1.4	12.6	41.1	68618	6.80476
687	6067005804	46.7	86.6	1.9	4.5	50.5	81375	6.6
688	6067005901	44.2	75.5	6.1	9.3	47.4	67487	6.9
689	6067007503	49.7	71.1	9.3	18.2	31.5	43604	7.2
690	6067006004	50.5	83.2	2.3	8.2	46.8	66375	6.8
691	6067008203	46.8	87.6	2.6	11.9	47.5	67154	6.83333
692	6067008204	49.5	78.8	5.7	10.1	43.7	66500	6.875
693	6067008207	51.2	88.2	0.2	9.9	40.9	73438	6.8
694	6067004602	50.2	45.4	14.3	56.1	28	31380	6.2
695	6067006800	50.3	44.4	7.7	59.2	29.1	30778	6.5
696	6067006900	50.7	65.5	16.7	31.6	39.4	32604	6.28571
697	6067009328	52.6	38.7	13.5	12.6	32.9	90407	6.33333
698	6067009329	47.7	35.2	22.6	23.4	27.5	50469	6.55
699	6067009330	47.2	47.3	5.8	22.7	35.4	74318	6.64286
700	6067009331	51.4	43.5	13	17	38.6	107813	6.56667
701	6067009408	49.3	84.8	5	24.5	44.6	84917	6.04737
702	6067009502	50	72	6.9	28.8	35.4	69654	5.91667
703	6067009503	48.9	76.1	0.1	44.5	41.3	37938	5.9
704	6067009504	50.8	76.7	0.2	40.3	35.9	51417	5.9
705	6067009619	45.3	47.5	11.6	21.1	37.4	81296	5.68
706	6067009403	49.8	66.9	0	29.3	32.3	67500	6.027
707	6067006002	45.2	80.9	4.9	16.2	40.1	41552	6.7
708	6067006003	51.4	76.9	2.8	26.9	38.5	46533	7
709	6067006102	44.3	68.8	11.9	10.9	43.5	43500	6.8
710	6067006201	47.2	60.4	14.4	31.9	34.8	29601	6.65
711	6067006202	50	60.8	13.4	37.3	30.9	25911	6.4
712	6067004904	47.2	50.9	15.6	31.2	31.4	41939	6.16667
713	6067007209	46.8	84.8	1.6	16.6	41.3	51157	6.8
714	6067007208	51.4	71.9	4	14.7	35.3	44904	6.58889
715	6067000100	45	87.9	0	10.7	43.8	87500	6.35
716	6067008501	48.8	77	0	12.7	37	119612	5.58182
717	6067007004	49.7	40.6	22.3	37.8	27.3	41640	6.3
718	6067007013	44.9	64.4	14.6	33.8	38.6	63693	6.3
719	6067007301	51.4	55	12.7	35	25.4	34621	6.93571
720	6067009201	49	60.6	4.9	20.3	44.3	43792	6.51818
721	6067009630	47.7	35.2	11.3	15.6	30.1	84570	6
722	6067009632	46.8	33.6	13	14.5	33.6	95096	6
723	6067009005	43.9	64.4	10	14.8	35.2	50303	6.55
724	6067009007	50.7	48.5	23.9	28.2	26.8	43333	6.4
725	6067009008	49	66.5	6.1	28.4	36.2	37404	6.8
726	6067007601	46.2	75.3	9.5	12.8	41.9	42016	7.175
727	6067007602	50.3	79	4.1	7.3	43	41839	6.8
728	6067007701	48.2	82.4	7.1	9	35.2	47161	6.8
729	6067007702	40.6	85.3	1	9.7	49.9	81037	6.83333
730	6067000200	44.8	84.2	2.3	12.5	42.6	71545	6.23333
731	6067000300	43.8	83.2	1.3	12.1	39.5	81528	6.3
732	6067000400	49.7	81.6	2.9	26.4	32.1	49038	6.3
733	6067000500	48.4	71.2	8.8	25.5	28.1	38576	6
734	6067000600	53.9	59.4	19.5	15.7	33.2	26897	6
735	6067007014	45.4	58.1	15	46.5	31.5	52096	6.1
736	6067007007	50.5	65	7	56.3	31.6	53655	6.25
737	6067007204	52	59.6	12.3	17.5	30.7	53984	6.80833
738	6067009332	53.3	60.4	1.7	10.7	37.9	146285	6.54
739	6067009634	48	34.7	28.9	26.2	24.8	34836	6.2
740	6067009638	74	45.7	21.4	22	39.1	71769	6.02183
741	6067005205	48.9	60	22.6	15.8	30.7	22419	6.15455
742	6067009635	49.6	28.7	20	17.3	28.9	90996	5.83636
743	6067009636	52.1	36	12.5	24.7	33.4	88175	6.05
744	6067009639	49	32.1	16.3	18.1	29.5	41794	6.1
745	6067009109	52.8	64.4	9.7	14.2	39	79821	6.3
746	6067009105	56.2	61.8	18.1	21.8	26.5	44918	6.5
747	6067009106	50.9	75.1	5.8	13.8	36.6	54496	6.4
748	6067007801	48.8	80.9	5.2	8.6	40.4	43394	6.85714
749	6067007802	53	80.2	9.7	11.5	43.8	50906	6.85
750	6067008702	46	81.3	0	4.6	50.6	139318	6.76
751	6067007906	52.8	89.6	1.1	10	46.3	61719	7.1
752	6067000800	50.1	80.3	3.7	10.3	48	49464	6
753	6067001300	56.6	70.9	4.3	19	31.9	41464	6.1
754	6067001400	48.8	79.5	6.4	16.8	35	34464	6.1
755	6067001500	40	84.9	1.6	9.7	42.4	66377	6.15
756	6067009606	48	31	32.6	32.7	29.3	33977	6.35
757	6067009610	44.9	24.1	25	26.7	27.8	48793	6.1
758	6067007010	47.1	56.7	13.2	22.1	28.7	48421	5.93333
759	6067007015	49.7	51.9	19.9	14.5	31.3	52799	5.95
760	6067007016	50.2	51.5	6.3	25.3	31.1	84451	5.975
761	6067007017	41.8	52.1	6.1	27.3	29.9	91694	6.00909
762	6067001101	56.8	74.4	6.7	11.4	40.9	22723	6.05
763	6067003204	54.7	22	5.7	26.4	29	26661	6.4
764	6067004501	54.1	27.8	13.1	45	29	26827	6.2
765	6067004502	49.8	62.2	7.3	49.1	29.8	28179	6.1
766	6067004701	45.2	47.3	15.3	49	24	18250	6.35
767	6067009107	49.1	71.1	8.8	13.1	36.5	66447	6.43333
768	6067009111	47.7	68.6	10	34.7	31.4	46730	6.6
769	6067008909	46.8	69.8	11.3	18.7	46.3	73141	6.8
770	6067007905	49.1	83.7	3.6	11.4	46.4	75284	7.1
771	6067007903	50.1	81.1	5.4	18.3	38.7	70533	7.3
772	6067007904	49.1	85.3	5.7	17	42.1	74795	7.3
773	6067008404	43.7	89.3	0.2	16.2	41.7	45781	6.4
774	6067008142	50.5	83.6	1.1	19.5	31.5	50789	7.3
775	6067004010	43.8	45.7	15.2	18.5	34.9	54281	6.06667
776	6067001600	49.8	85.3	0.7	7.6	43.5	81563	6.275
777	6067001700	43.6	72.9	5.5	12.9	37.7	48571	6.13333
778	6067004009	47.6	35.7	17.5	13.3	37.8	74559	5.9
779	6067004012	43.7	43.3	12.7	10.2	42.5	96731	5.93333
780	6067007020	46.5	53.9	3.4	23.6	36.4	81850	6
781	6067007102	49.2	51.5	13.5	9.4	41.1	80111	6.32857
782	6067007106	49.5	33.4	5.1	15.1	30.3	104097	6.525
783	6067004702	53.2	48.7	16.6	49.9	27.8	33832	6.33333
784	6067005204	50.9	77.6	3.6	18.6	42.8	69107	6.46
785	6067005510	43.3	70.8	9.7	25.9	27.8	38712	6.4
786	6067005904	45.9	89.5	2.3	11.6	43.4	49970	6.8
787	6103001100	50.8	81.2	0.1	43.5	29.2	44548	5.84175
788	6103000400	51	89	0	6.9	48.1	61098	6.04478
789	6103001000	47.6	80.1	1.9	34.4	36.3	40790	5.57361
790	6103000100	49.6	87	3.1	13.5	48.2	40553	4.68746
791	6103000300	54.5	85	0.3	14.5	42.5	36302	4.47088
792	6103000900	50.1	93	0	24	42.2	33934	4.89423
793	6103000700	49.2	83.6	0.3	24.5	33.5	35022	6.25
794	6103000800	54.4	87.8	0.6	25.8	40.5	40665	6.03026
795	6103000200	47.7	91.7	0.3	6.9	43.7	49771	5.65521
796	6103000600	46.6	86.8	0.1	21.2	42.7	35885	6.0625
797	6103000500	48.4	90.1	0.2	20.6	34.8	35421	6.18182
798	6011000100	50	67	0	58.6	31.2	55386	5.53988
799	6011000300	51.2	74.2	0.8	68.8	30.3	50125	5.0633
800	6011000400	52.1	88.8	0.7	37.5	39.8	43147	4.05206
801	6011000200	56.1	74.5	1.6	42.8	36.4	59643	5.36773
802	6011000500	46.9	62.7	1.4	52.8	34.5	44116	4.4774
803	6019000600	55.3	40.6	6	72.8	29.7	17500	7.6
804	6019006402	53.5	80.9	0	7.8	46.4	61555	2.4924
805	6019006403	53	89.1	0.5	19.3	48.1	50313	3.22283
806	6019005000	47.9	65.8	7.4	42.2	37.6	42708	7.075
807	6019001202	48.4	31.3	6.2	76.7	25.6	33255	8.1
808	6019002100	47.4	71.4	3.3	55.2	35.2	32747	7.3
809	6019002501	55.6	35.5	3.5	70.6	23.2	23148	7.5
810	6019004602	48.3	83.4	0.9	19.6	42.8	70087	7.125
811	6019005504	50.6	82.7	1.7	16.4	35.4	95577	5.25
812	6019002200	48.1	66.1	2.9	48.1	36.8	31458	7.35
813	6019002300	45.3	62.5	9.7	56.1	30.7	35042	7.4
814	6019004212	43.4	63.5	9	37.6	27.7	47789	7
815	6019005508	48.5	69.5	2.9	19.1	37.4	111208	6.5
816	6019005801	48.5	68.3	4.4	29.3	33.8	50000	6.5
817	6019002400	47.9	41.7	2.8	69.9	27.9	21016	7.45
818	6019002502	50	27.8	2.6	59.6	22.2	27154	7.5
819	6019005510	46	73.1	6.9	16.6	39.1	48750	6.45
820	6019005509	46.1	64.6	2.5	35.7	32.7	57023	6.5
821	6019004002	49.6	76.2	0	74	30.3	43500	6.48
822	6019004801	44.5	73.9	7.4	65.3	28.5	23628	7
823	6019004001	51	72.7	0	68.5	27.2	51303	6.072
824	6019005516	48.1	80.5	0.6	24.3	39.6	73960	5.66667
825	6019003302	47.8	53	4	62.8	30	31382	7.5
826	6019003301	43.1	30.4	1.3	47	27.8	43577	7.2
827	6019002800	53.8	28.3	9.6	64.8	24.7	21838	7.475
828	6019003400	53.8	57	5.3	55.2	29.1	27600	7.25
829	6019001201	50.5	32.7	7.9	74.7	25	31047	8
830	6019007500	49.4	58.7	1.2	71.9	24.4	49673	5.90119
831	6019007600	53.9	47.2	0.7	69.7	28	32324	5.85889
832	6019004901	46	60.1	4.1	46.1	27.5	29556	7
833	6019003701	42.6	50.5	9.4	50.2	25.9	27159	7.25
834	6019003500	51.6	60.8	9	56.4	31.8	34167	7.25
835	6019003600	51	79.2	1.6	35.7	37.9	58042	7.25
836	6019008401	51.8	77.1	0.7	83.9	26	31911	5.03947
837	6019008402	54.2	83.6	0	67.3	26.6	31513	5.8671
838	6019000700	47.3	30.6	29.6	56.9	27	25200	7.6
839	6019001500	58.1	58.1	0.6	68.6	39.7	23281	8.25
840	6019004802	49.4	71.2	5.1	57.5	28.9	25014	7.05
841	6019003702	52.4	59.9	14.4	51	34.7	32542	7
842	6019003807	47.9	66.2	2.1	52.9	36.1	34053	7.2
843	6019004405	48.7	78.9	1.9	20	42.7	89632	6.35
844	6019004406	47.9	87.8	0.9	24.3	39	60905	6.2
845	6019001800	51.8	55.7	1.8	57.1	35	43704	8.275
846	6019003809	46	62.9	7.1	56.7	30.1	53148	7.35
847	6019003810	51.7	60.3	2	47.3	26.5	55018	7.35
848	6019004701	47.3	57.5	11.5	52.3	28	37143	7.1
849	6019004208	50.1	70	2.3	13.9	39.4	95982	6.5
850	6019004205	51.2	41.2	16	45.3	30.1	32632	7.16667
851	6019001900	46.3	67.3	3.5	55.4	40.2	42386	7.79545
852	6019002000	53.2	49.1	14.4	56.4	30.3	24917	7.2
853	6019004409	44.6	81.8	0	24	35.6	60648	6.35
854	6019005505	48.9	61	1.7	15.3	32.7	106974	5.6
855	6019005507	48.2	68.4	3.7	19.9	33.5	79615	6.5
856	6019004404	49.8	52.7	1.4	60.6	24.8	39181	6.15
857	6019004213	48	68.6	8.4	35.6	31.4	54390	7.1
858	6019005517	48.5	82.2	1.8	15	33.3	108654	5.675
859	6019005100	50.6	47.8	11.6	55.2	30	29369	7.1
860	6019004211	50.8	60.9	12.5	40.1	32.5	72462	6.9
861	6019003805	55	54.1	10.4	44.9	30.3	32965	7
862	6019004408	49.6	66.7	0.9	28.2	29.6	61113	5.94
863	6019005410	48.7	67.1	4.2	33	27.5	41211	6.7
864	6019005608	53.1	79.8	0	27.9	39.3	36076	6.3
865	6019005302	48.2	58.7	7.3	41.3	27.3	33009	7
866	6019004207	52.1	45.8	10.8	45.6	28.3	60561	6.61111
867	6019004210	52.2	59.6	7	38.8	28.6	62386	6.6
868	6019004301	47.3	82.6	6.4	8.6	53.8	123083	6.31667
869	6019005525	53.6	84.1	0.3	31.2	42.2	81583	5.1
870	6019005602	46.8	65.6	0.3	26.6	38	36411	6.3
871	6019004303	45.2	81.3	5	15.8	55.4	64598	6.9
872	6019005703	46.6	76	3.3	16.1	44.7	92269	6.3
873	6019005407	51.5	79.9	1	30.1	39.2	59659	6.5
874	6019003900	50.9	86.7	1	66.2	34.8	34135	5.68286
875	6019004100	50	70.1	0.5	61.6	37	35425	6.67069
876	6019007400	51.6	65.1	0.4	56	30.1	39732	5.73273
877	6019000502	53.5	42	4.1	70.9	28.8	33856	7.6
878	6019005704	46.2	57.8	0.5	44.7	31.3	53427	6.275
879	6019005802	49.8	64.3	4.6	17.7	42	73750	6.6
880	6019000100	79.9	29.3	10.4	57	33.3	11718	7.4
881	6019007700	50.9	54.2	2.6	74.6	25.6	42883	4.91292
882	6019004505	42.7	61.9	9.6	40	29.5	29977	6.75
883	6019004506	46.8	91.3	0.4	14.1	53.3	65714	6.8
884	6019001410	50.7	27.2	4.7	58.8	25.1	44796	8
885	6019000200	46.7	34.4	18.5	69.8	24	15765	7.55
886	6019008200	52.2	86.6	0	91.2	26.5	26696	5.42424
887	6019008301	54	82.8	1	97.5	28.3	34607	4.94048
888	6019007300	57.1	58.4	2.1	51.6	31.2	47763	6.08077
889	6019004601	52.8	83.6	9.3	32.1	45.4	39006	7.3
890	6019004703	52.8	52.6	14.6	54.2	29.6	38137	7
891	6019004215	49	58.4	5.8	35.9	34.7	75306	6.56667
892	6019004216	45.2	65.8	11.9	33.7	34	68750	6.6
893	6029005004	48.9	69.1	0	80.4	28.7	33502	7.35
894	6029005003	51.1	74.4	8.3	79	25.3	29979	7.25
895	6029005201	52.4	94.7	0.5	2.8	54.9	37594	6.14966
896	6029004902	53.5	57.8	0.2	68.4	30	45559	7.35
897	6029004800	49.8	77	0.9	87.6	24.6	28777	7.38333
898	6007000901	49.1	95.6	0	3.6	46.7	93152	5.69474
899	6007000903	48.8	79.7	2	18.4	29.8	39509	5.48333
900	6007000700	45.8	80.3	2.2	7.3	28.5	39060	5.35
901	6007000501	54	79.2	1	20	24.6	43477	5.28571
902	6007000202	50.3	84.2	2.8	11.7	45.6	36091	5.4
903	6007003600	51	78.7	0.3	27	36.1	43533	4.88196
904	6007000300	46.2	78.3	2.4	23.8	30.3	39762	5.35
905	6007000102	49.8	86.9	0.5	15.2	37.9	52037	5.5
906	6007000601	52.9	89.3	0	13.5	33.8	57772	5.3
907	6007000604	58.8	80.4	4.3	15.9	22.3	20031	5.25
908	6007000800	52.4	82.1	0.6	14.4	42.7	54429	5.56
909	6007001300	45.5	72	1.2	25.6	29.5	31194	5.28571
910	6007001400	49.6	93.2	0	10	44.9	68268	4.99072
911	6007001500	52.3	93.3	0.3	9.1	39.7	62994	5.0401
912	6007002400	53.4	87.7	0.3	4.8	53.1	36310	3.61704
913	6007003400	55.2	75.5	1.1	40.5	36.4	39917	5.21702
914	6007002500	50.9	65.9	5	10.2	29.2	40451	5.6297
915	6007002700	49.7	79.6	2.9	9.9	42.4	50335	5.76
916	6007002900	51.6	72.9	0.2	15.2	31.1	41014	5.62857
917	6007003100	50.3	79.1	1.8	10	41.5	50286	5.67143
918	6007003200	48.9	77.4	1.1	22.4	41.5	39551	5.5814
919	6007003300	54.8	73.2	5.7	24.6	43.5	39583	4.98356
920	6007001600	50.9	88.7	0.3	12.9	45.3	64900	4.56697
921	6007001800	48.1	90.7	0	7.3	52.8	35156	5.08571
922	6007001900	46.8	90.4	0.8	11	52.3	47083	4.74444
923	6007002000	49.4	92.9	0	7.7	46.3	36875	4.97
924	6007002100	50.8	88.5	1.6	5.4	51.1	47596	5.52727
925	6007002200	47.1	97.8	0.3	4.5	52.9	51441	5.93648
926	6007002300	45.9	93	0.7	10.8	52.5	31613	5.54
927	6007001702	53.3	94.6	0	9.9	48.8	39752	4.82195
928	6007000201	52.1	87.7	0	21.1	31.1	36699	5.34
929	6007000603	52.5	77.8	0.5	9.7	21.7	22639	5.3
930	6007001000	40.6	85.4	3.8	16.4	22.7	33242	5.36667
931	6007001100	53.6	85.3	2.8	11.4	23.3	30136	5.2125
932	6007001200	48.7	83.7	0.4	19.3	24.9	30313	5.17778
933	6007002800	46.3	83.8	0.7	13.1	33.5	25747	5.8
934	6007000103	48.1	84.4	1.6	10.7	32.7	75455	5.45
935	6007000104	48.4	74.1	1.8	18.1	34.1	45082	5.5
936	6007000401	42.5	85.3	1.6	23.2	31.2	63631	5.48571
937	6007002602	48.8	93.1	0.7	1.9	53.1	51402	5.0129
938	6007000402	47.6	90.9	0.9	11.8	36.7	71543	5.36667
939	6007000904	46.1	90.1	2.2	10.7	50.2	56997	5.625
940	6007001703	41.1	84.3	0	6.9	44.8	44643	4.675
941	6007001704	51.8	94.7	0	3.3	42.5	36852	3.96951
942	6009000210	51.1	88.5	1.2	13	48.3	66847	5.24776
943	6009000120	52.5	94	1.7	5.9	41.6	66154	5.03606
944	6007002601	46.1	84.5	1.3	8.9	58.6	52124	5.1087
945	6007003502	52.7	81.1	1.3	54.1	29	40494	4.61127
946	6007003001	45.9	63.6	8.1	7.9	26.6	30989	5.9
947	6007003002	48.4	74.7	1.6	22.7	34.9	35132	5.69048
948	6007003501	49.5	80.1	0	25.2	37.8	52500	4.89394
949	6007003700	48.5	76	0.8	6.2	39.7	38446	5.44898
950	6009000220	54.4	89.6	0.2	12.3	43.8	65417	4.91613
951	6009000300	55.7	89	2.5	15.4	52.1	49211	5.41113
952	6009000400	45.8	87.5	1.6	7	49.1	42098	4.71704
953	6009000122	44.1	93.1	0.8	4.2	50.1	44505	5.4373
954	6009000504	46.9	87.7	0	17.6	63.8	36136	4.12742
955	6009000121	45.1	95	0	13.1	50.3	52444	5.50598
956	6009000501	46.5	95.8	0	5.2	55.9	69181	4.68947
957	6009000503	52.1	93.3	0	5.5	58.6	52216	4.33929
958	6077002701	48.2	60.9	2.6	68	32.8	41905	6.05
959	6077002702	51.4	80.4	2.8	74.1	29.5	50625	6.06667
960	6077003110	49.3	46.8	12.2	38.6	33.9	38116	6
961	6077005209	50.2	38.6	13.2	37.7	34.8	88177	6.325
962	6077005207	52.2	41.7	7.4	28.8	32.8	102851	6.44082
963	6077003111	48.6	48.4	19.6	29	38.2	47589	5.9
964	6077000500	62.6	61.4	0.9	67.1	28.6	28242	5.95
965	6077000600	49.4	51.1	3.3	75.5	29.1	31083	6
966	6077000700	53	33.6	5.3	73.3	26.5	36850	6
967	6077005135	42.9	76.3	0.8	23.7	39.8	72288	6.19
968	6077005206	47.9	51.6	9.4	25.3	32.5	91332	6.165
969	6077000900	48.8	69.4	7.5	46.1	32.5	36638	5.8
970	6077002300	46.6	41.2	9.2	78.2	24.3	23620	6.1
971	6077003209	48.5	57.8	9.2	30.6	43.2	61679	5.9
972	6077004204	53.2	91.5	1.5	17.8	47.3	41696	6.1
973	6077005109	44.6	85.2	1.4	37.6	34	41508	6.3
974	6077005403	50.4	57.7	9.7	35.2	37	80368	6.23333
975	6077003213	45.2	50.6	12.4	37.5	37.7	65938	5.9
976	6077005001	46.1	90.1	1.1	25.3	41.9	56533	5.84286
977	6077005004	50.2	84.2	1.3	21.4	32.1	83482	5.97826
978	6077002100	53.1	52	14.3	67.5	26.3	36294	6.18
979	6077000402	56.1	70.6	13.5	48.2	35.2	19414	6.1
980	6077002800	50.8	34.6	20.7	61.9	27.4	52660	6.1
981	6077001600	49.1	77.4	0.4	66.8	28	39318	5.85
982	6077004902	51.4	87.1	0.2	31.6	34.4	60028	5.85125
983	6077003106	47.7	75.4	4.9	18.2	44.5	63258	5.65
984	6077003109	45.7	63.6	10.1	24.7	40.2	53118	5.8
985	6077004901	51.5	90.5	0.6	20.9	41	53218	5.55455
986	6077004701	53.6	95	0	31.6	37.1	49567	6.10625
987	6077005126	46.7	65.9	6.3	42.2	31.1	42062	6.2
988	6077004800	46.7	74.9	0.9	35.2	38.1	77031	5.45224
989	6077005124	48.4	70.4	4.5	45.5	37.5	47313	6.15
990	6077004102	44.3	53.8	3.5	25.9	34.8	61373	6.06119
991	6077004305	48.1	82.1	1.7	22.2	36.3	66031	6.05
992	6077003203	43.4	69.1	1.9	13.4	38	56703	5.86667
993	6077003205	48.3	66.7	8.6	24.8	42.4	64489	6
994	6077000100	58.6	49.9	14.8	52.1	38	14977	5.9
995	6077004402	48.3	76	2.7	32.6	31.6	59635	6.1
996	6077004600	53.2	86.2	1.8	24.6	44.3	58125	6.00988
997	6077004201	47.4	87	2.2	27	34.6	52486	6
998	6077004203	46.8	87.3	1.5	46.8	29.4	32465	6
999	6077004202	45.3	88.8	0.4	6.6	54.6	80849	6.2
1000	6077004104	51.4	88.9	0	8.7	44.6	103068	6.01
1001	6077000300	43.2	61.6	12.5	51.8	33.6	20455	5.9
1002	6077003801	52.1	31.1	18.9	34.2	26.2	63247	5.83333
1003	6077001200	40.5	71.4	1.9	21.6	23.3	64844	6.06667
1004	6077002201	45.6	44.5	26.9	64.7	29.6	29092	6.1
1005	6077002202	48.7	43.7	26.5	69.5	25.7	26012	6.06667
1006	6077002401	49	33.6	9.4	57.5	32.8	33065	6.05
1007	6077003410	48.5	32.9	17.9	33.8	31.6	51823	6.06667
1008	6077003407	46.2	34.2	17.9	42.4	26.2	29500	6
1009	6105000300	56.8	86	0.7	6.7	43.6	26905	4.73958
1010	6105000200	50.1	90.5	1.4	3.3	51.1	36275	4.55086
1011	6077004302	48.4	87.1	2.8	26.8	35.5	40841	6.2
1012	6077004303	48.4	83.8	0.1	16.9	46.5	81344	6.025
1013	6077005123	47.1	58.9	3.3	43.9	30.2	66424	6.13333
1014	6077005106	50.2	70	4.1	32.8	33.2	77419	6.0693
1015	6077005110	51.7	81.6	2.6	38.3	35.4	66135	6.16
1016	6077001900	52.6	49.9	11.5	73.5	29.4	27100	6.1
1017	6077003108	48.2	65	14	29	35.6	53538	5.75
1018	6077003112	43.2	51.2	13.4	27.4	40.4	48750	5.6
1019	6077004703	50	83.7	0.1	32.3	42	63990	5.69949
1020	6077004704	53.3	83	0.3	26.5	46.2	58542	5.69174
1021	6077005131	56.4	79.1	6.3	24.9	35.6	60411	6.15169
1022	6077005132	42.9	81.7	0.7	44.4	28.8	46514	6.1
1023	6077005133	51.5	79.5	1	45	38.4	63659	6.2
1024	6105000101	52.9	91.5	0	7.4	50.4	34271	4.41708
1025	6077005113	45.3	81.1	6.5	31.5	39.5	65292	6.12222
1026	6077005114	50.6	66.5	3.9	35.7	31.9	85236	6.1
1027	6077005122	51.5	72.6	3.6	41.3	30.3	69192	6.05333
1028	6077005119	49.2	38.1	12.7	29.5	30.1	68421	5.93721
1029	6077005108	54.3	78.8	3.5	52.8	27.8	42667	6.2
1030	6077003113	45	38.5	18.5	32	27.1	34350	5.83333
1031	6077003114	47.2	62.4	6.1	19.1	40	101224	5.775
1032	6077000401	54.6	70.9	6.5	27.1	44	47525	5.9
1033	6077003310	50.1	37.7	15	34.2	33.1	39420	6.2
1034	6077003308	46.4	52.1	14.3	40.1	26.9	37400	5.9
1035	6077005134	52.7	76.7	0.7	35.5	33.2	73021	6.2
1036	6077004404	51.4	78.9	0	55.3	29.6	33608	6.04
1037	6077004105	52.9	83.4	0.6	29.7	42.6	70208	6.1
1038	6077004106	51	82.3	1.1	40.9	42	61696	5.95657
1039	6077001000	48.3	74.5	7.3	28.5	43.4	51328	5.85
1040	6077001300	48.2	64.5	6.4	47.3	32.4	45310	6
1041	6077001400	43	54.3	1	36.3	33.2	37390	6
1042	6077003305	50.5	64	2.3	40.1	42.1	46764	6
1043	6077003306	51.5	47.1	13.7	44.1	28.4	42292	6
1044	6077003307	46.7	48	11	38.6	32.6	25893	6
1045	6077003406	46	25.6	13.1	34	26.1	33726	6.2
1046	6077003215	48.3	55.3	12.6	29.7	33.6	57723	5.82222
1047	6077005202	49.2	67.7	3.2	23	35.1	92708	6.11143
1048	6077004307	49.2	77.4	4.2	21.2	38.2	48864	5.95
1049	6077005308	47.1	56.4	7	44.2	31.2	64118	6.3
1050	6077002503	47.7	22.3	11.5	37.6	20.9	28854	5.9
1051	6077004502	49.2	60.7	0.2	81.5	26.1	23802	6.05
1052	6077005210	51.6	59.7	6.6	35.2	30.1	95766	6.425
1053	6077001500	48	56.6	4.9	55.9	26	33750	6.06
1054	6077001800	52.1	62.1	2.6	68.9	32	31208	6.1
1055	6077002000	48.7	58.5	13.7	73	30.9	34965	6.1
1056	6077005305	50.6	76.3	2.9	46	32.2	66250	6.2
1057	6077005302	53.4	64.7	1	49.7	31.8	50616	6.25
1058	6077005303	50.5	67.3	4.1	51.8	28.3	38456	6.3
1059	6077005127	50.8	50.5	9	43.2	28.7	75295	6.1
1060	6077005003	48.6	89.6	0.9	24.5	34.1	100833	6.0881
1061	6077004001	55.6	75.8	0.3	54	39.9	43000	5.65926
1062	6077005307	54.9	52.7	4.4	32.6	30.9	62207	6.25
1063	6077005405	46.8	49.9	7.4	63.2	31.3	52321	6.3
1064	6077005406	47.7	56.3	4.7	48.5	34.6	56278	6.3
1065	6077005501	83	63.7	18.6	28.9	35.1	50764	6.17957
1066	6077002402	53.7	36	14	73.1	29.3	29146	6.1
1067	6077003208	46.7	49	12	23.9	33.7	87257	5.9
1068	6077003210	49.8	66.4	4.7	19.3	49.1	61385	5.9
1069	6077003311	47.1	58.8	6.5	39	28.4	45795	6.2
1070	6077003404	53.4	29.8	11.4	34.5	28.9	41716	6.2
1071	6077003405	54.6	26.8	7.9	34.2	26.6	41667	6.1
1072	6077004002	49.7	45.2	10.5	22.7	30.9	92451	5.89
1073	6077003217	50	33.1	11.4	41.4	27.7	40451	5.8
1074	6077005129	52.6	68	3.4	65.5	32.6	51299	5.9
1075	6077000801	48.4	45.5	14.9	63.3	28.2	46841	5.79231
1076	6077003409	45	23.7	9.4	41.2	30.2	45731	6.2
1077	6077003403	45.3	26.2	8.8	28.5	29	56929	6.25
1078	6077003500	51.1	37.6	11.2	24.3	32.3	54710	6.09677
1079	6077003601	50.1	71.5	1.8	36	44.3	52800	6.17714
1080	6077003602	55.4	84.1	0	48.9	33.7	44781	6.05882
1081	6077003700	48.8	77.6	0.2	60.8	33.2	36014	6.16122
1082	6077003900	59	60.9	0.3	71.8	35.5	31961	5.52315
1083	6077001700	46.4	70.3	0.6	70.6	27.7	33036	6
1084	6077003802	49.2	39.8	17.9	39.6	29.9	70451	5.925
1085	6077003803	61.2	63	11.6	51.1	31.9	44531	6.03269
1086	6077003216	51.2	39.8	29.8	28.6	36	61250	5.9
1087	6077003313	47.5	29.4	25.7	34.5	27.3	25530	5.9
1088	6077004308	50.4	61	0	44	28.8	38750	6.1
1089	6077004403	51	57.4	3.9	77.3	23.2	32250	6.1
1090	6077001101	50.7	56.6	10.4	46.9	30.9	54521	5.9
1091	6077001102	46	65.5	1	46	39.2	34922	5.9
1092	6077004501	40.5	84.5	0	38.7	36.2	47593	6
1093	6077005130	45.8	67.4	0.7	58.6	29	54864	6
1094	6077005208	51.8	52.8	6	32.2	34.3	72528	6.3
1095	6089012301	50.9	90.8	1.2	9.8	40	36208	6.065
1096	6089010300	52.6	81.9	3.6	13.7	28.5	42183	6.1
1097	6089010900	46.2	86.4	1.2	12.5	35.4	33131	6.18
1098	6089011500	48.1	87.1	0.8	3.6	46.1	48145	6.08269
1099	6089011600	48.5	85	1.1	8.9	42	31941	5.95333
1100	6089011900	51.2	87.7	1.7	6.4	49.9	68402	6.21154
1101	6089012000	46	74.5	0.9	13	34.4	31563	6.03077
1102	6089012200	48.2	84.8	0.7	15.8	38.9	48442	5.86
1103	6089012302	49.8	92.7	0	7.7	46.7	46815	5.62883
1104	6089012303	52.6	96.6	0	5.9	42.8	58343	5.73258
1105	6089010100	58.7	81	3.2	7.3	38.7	25842	6.1
1106	6089010200	47.4	96.5	0.6	3.6	41.6	36042	6.15
1107	6089010400	48.2	89.9	1.4	8.3	42.4	26200	6.12222
1108	6089010500	45.1	83.7	1.7	14.6	36.2	29082	6.1
1109	6089011100	48.9	89.1	1.1	9.4	41.3	61719	6.05714
1110	6089011300	44.9	88.2	0.5	5.3	33	43032	6.04
1111	6089012400	54.1	91.4	0.4	5.7	46.6	55357	4.44332
1112	6089010702	50.6	90.7	0.3	5.8	43.3	57368	5.98333
1113	6089010704	49	79.8	0	9.5	45.5	33236	6.12857
1114	6089010804	41.2	90	0.6	2.2	30.7	69279	6.24
1115	6089010603	49.4	94.8	0.1	10.7	42.6	68903	5.93077
1116	6089011002	52.5	92.6	0.9	7.8	40.5	48354	6.04167
1117	6089010807	46	90.2	0.1	9.4	45	65328	6.12727
1118	6089011402	49.5	88.1	2.2	14.5	40.1	73021	6.16667
1119	6089012102	40.4	91.1	0	8.3	52.6	32391	6.19091
1120	6089010601	49.1	88.8	0.1	3.6	43.2	67132	6.06667
1121	6089010602	45.2	84.6	0.8	9.2	36.3	62688	6.02
1122	6089010703	48.7	92.1	0	3.2	36.1	37675	6.05
1123	6089010803	49.7	84.9	3.8	9.1	32.8	50138	6.13333
1124	6089010805	50.8	83.5	0.5	4.6	31.8	48605	6.17778
1125	6089011401	46.1	90.3	0	5.2	39.8	52309	6.1
1126	6089011403	52.1	80.8	0	24.3	39.7	72100	6.1625
1127	6089011801	49.2	86.9	0.4	4.5	45.7	67654	6.13659
1128	6089011701	48.2	89.3	0	4.3	40.4	44699	5.97143
1129	6089011702	48.3	83.9	0	19	37.2	29743	5.9
1130	6089011001	48.8	90.9	0.1	7.6	47.4	73125	5.80755
1131	6089012101	45.4	89.1	2.5	6.5	38.6	38817	6.1375
1132	6089010806	55	94	0	5.3	36.4	39954	5.94167
1133	6089011209	51.9	78.5	3.4	16.5	32	31618	6.1
